15  
16  
17  
18  
19  
20  
21  
22  
23  
24  
25  
26  
27  
28  
29  
30  
31  
32  
33  
34  
35  
36  
37  
38  
39  
40  
41  
42  
43

## Abstract

### Background and objectives

Medical students regularly report high study demands and low mental health. We thus studied medical students in two different curricula in Germany investigating their study demands, study and life satisfaction, and overall and mental health with emphasis on contrasting beginners and advanced students.

### Design and methods

We used online surveys with convenience samples through university mailing lists and student union channels. Uni1 participants ( $N=357$ ; 70% female,  $M=24.83$  years) were older than Uni2 participants ( $N=126$ ; 79% female;  $M=23.39$  years), but the cohorts did not differ further regarding sociodemographic variables. For analyses, we used  $t$ -tests for comparisons and correlations for associations.

### Results

Students of both universities reported good mental and overall health as well as high satisfaction with their studies and lives, yet sleep difficulties were prevalent. Study demands were low to medium with the highest demands being learning activities ( $M=5.31$ ;  $SD=2.19$ , scale 0-10), self-structuring ( $M=4.61$ ;  $SD=2.01$ ), and performance pressure ( $M=4.45$ ;  $SD=2.27$ ). The students in the reformed degree programme reported fewer issues with integrating theory and practice compared to those in the regular degree programme ( $M_{Uni1}=3.38$ ;  $SD_{Uni1}=2.05$ ;  $M_{Uni2}=4.17$ ;  $SD_{Uni2}=2.06$ ;  $t(430)=-3.53$ ,  $p<.001$ ).

### Discussion and conclusions

Our sample was rather resilient regarding mental health and coping with study demands. The two universities showed little to no differences. With relative increased demands regarding learning activities, self-structuring, and performance pressure we suggest to focus on learning strategies for beginners and strategies for stress reduction to address, among other things, the reported sleep difficulties.

*Keywords:* student satisfaction; study demands; mental and overall health; medical students; online survey; stress

44

## 1. Introduction

45 Medical students regularly report excessive prevalence of depression [1], emotional  
46 exhaustion [2], burnout [3], and sleep difficulties [4] leading to low life satisfaction [5] as a  
47 result of stress. Impaired mental health is highly prevalent in university students with  
48 elevated levels of stress and depressive and anxiety symptoms [6].

49 Substance use as a malevolent coping mechanism is common in medical students [7] and  
50 translates into stress-burdened professional careers [8, 9]. In addition to these known  
51 factors, social support and structural conditions appear to be specific factors that can also  
52 impact the health of students [10, 11]. Understanding stress trajectories in their studies and  
53 creating an environment for better and healthier academic and professional achievements is  
54 one of the great challenges for medical faculties [12, 13]. Supporting resilience in students  
55 via specific intervention programmes has been proposed to mitigate stress trajectories [14-  
56 17]. Students burdened with poor mental health suffer disproportionately under high study  
57 demands. Furthermore, study demands seem to be a crucial source for stress [11]. An  
58 established measure for study demands in the German academic context differentiates six  
59 areas of demands: mode of science, learning activities, self-structuring, contact and  
60 cooperation, performance pressure and failure, and combining theory and practice [18].  
61 These areas cover the broad range of expectations towards students ranging from  
62 organising oneself to performing in examinations or academic thinking and writing.

63 Students interact with the learning environment and perceive it in different ways based on  
64 their individual resources and characteristics [19]. Medical education in Germany is  
65 undergoing a dynamic reform process. After the introduction of the model clause in the  
66 Medical Licensing Regulations (ÄAppO) in 1999, numerous initiatives for the reform of  
67 medical studies have been implemented [20]. Currently, there are 13 reformed degree  
68 programs in Germany, including University 1 (Uni1), as well as 26 traditional degree  
69 programs, including University 2 (Uni2). A university curriculum can be understood as a  
70 learning environment that enables students to have learning experiences in order to achieve  
71 specific educational goals [21], and curricula can impact student satisfaction [22-24].

72 The purpose of this paper is to analyse medical students' self-reported difficulties to cope  
73 with study demands, depression, exhaustion, sleep difficulties, general health status, and life  
74 as well as study satisfaction in two German universities, one structured following the  
75 reformed curriculum and one with a traditional curriculum. Exploratory studies have shown  
76 that these constructs are closely related to form stress trajectories – students with anxiety  
77 and stress tend to be overburdened by the workload leading to disengagement from their  
78 studies, depression, and burnout [25, 26]. The COVID-pandemic presented an additional  
79 burden potentially alleviating mental and overall health in students [27]. We suspect that the

80 workload and anxiety is higher for beginners compared to advanced students. Since  
81 beginners have little experience in university exams, they lack a frame of reference for  
82 demands and realistic assessments of their own performance [28, 29]. Although previous  
83 research indicates no evidence for different rates of depressive symptoms between  
84 beginners compared to advanced students [30], this lack of a frame of reference might lead  
85 to inadequate expectations and additional stress.

## 86 **1.1 Research questions**

87 The following research questions are formulated: How high are the levels of study  
88 demands, depression, exhaustion, sleep difficulties, general health status, and life  
89 satisfaction in the whole sample? How do Uni1 and Uni2 students differ regarding their  
90 levels of study demands, depression, exhaustion, sleep difficulties, general health status,  
91 and life satisfaction? Are these constructs correlated? What are differences between cohorts  
92 (beginners and advanced students) regarding study demands and mental health outcomes?

## 93 **2. Methods**

### 94 **2.1 Measures and definitions**

95 We included the constructs depression, general health status, emotional exhaustion,  
96 sleep difficulties, life satisfaction, study satisfaction, and difficulties to cope with study  
97 demands in our survey. Table 1 defines the constructs and provides their measures. All  
98 constructs were transformed into POMP-scores [31] with a range 0 (low depression scores,  
99 bad health, few sleep difficulties, low life and study satisfaction, few difficulties in study  
100 demands) to 10 (high depression scores, good health, many sleep difficulties, high life and  
101 study satisfaction, many difficulties in study demands).

102 ---TABLE 1 HERE---

### 103 **2.2 Procedure**

104 **2.2.1 Survey administration.** We programmed an online questionnaire in German hosted  
105 on in-house servers of the respective university in accordance with European data protection  
106 laws. Participation was enabled in spring 2022. We invited students via the dean of studies  
107 mailing list and via the student union's social media appearance.

108 **2.2.2 Ethical considerations.** The ethics committee voted that no detailed examination of  
109 the pseudonymous study design was necessary (vote 21-393-ANF from 21 November 2021).  
110 Our study was carried out in accordance with the Declaration of Helsinki, including, but not  
111 limited to the anonymity of participants being guaranteed. Participants provided informed  
112 consent.

113 **2.2.3 Statistical analysis.** Data were analysed using IBM SPSS Version 28. We  
114 calculated POMP scores for each variable in this analysis using the formula

$$115 \quad \left( \frac{(x_i - \min)}{(\max - \min)} \right) * 10$$

116 with  $x_i$  as individual observed values,  $\min$  as the minimum value and  $\max$  as the maximum  
117 value of the scale [31]. With their range between 0 and 10, POMP-scores can be intuitively  
118 interpreted in contrast to the varying original scores (e.g., 1 to 5 [18] or 0 to 3 [32]). The  
119 underlying linear transformation does not change the rank of values and is thus robust  
120 concerning parametric analyses, e.g. for  $t$ -tests, correlations, or Cronbach's  $\alpha$  [31]. We used  
121 descriptive statistics,  $t$ -tests, and correlations; results were considered statistically significant  
122 at  $p \leq .05$ . For differences between beginners and advanced students, we created a dummy  
123 variable with values 0 (semesters 1-3) and 1 (semesters 8-10). We used pairwise deletion for  
124 missing data.

## 125 **2.3 Sample characteristics**

126 **2.3.1 Inclusion criteria.** Medical students at Uni1 and Uni2 were invited to participate.  
127 We included participants who provided answers to  $\geq 20\%$  of the questions.

128 **2.3.2 Exclusion criteria.** We excluded students of other subjects and other universities  
129 from participation. We also excluded datasets with answers to less than 20% of questions or  
130 incomplete datasets in cases of multiple participations.

131 **2.3.3 Sample size calculation.** We did not perform a sample size calculation as this data  
132 collection was exploratory.

133 **2.3.4 Respondent characteristics.** At Uni1, the welcome page was visited 656 times.  
134 187 visitors were excluded immediately, because they provided no consent for participation  
135 or a subject of study other than medicine. We excluded 42 datasets for multiple  
136 participations. We additionally excluded 70 datasets with answers to  $< 20\%$  of questions.  
137 Thus, 357 medical students (70% female,  $M = 24.83$  years,  $SD = 4.99$  years) across all ten  
138 semesters of study ( $Median = 5^{\text{th}}$  semester) remained for analysis. At Uni1, 4,837 medical  
139 students were enrolled in the winter term 2021/22 resulting in a response rate of 7%.

140 At Uni2, the welcome page was visited 175 times. 33 visitors were excluded immediately,  
141 because they provided no consent for participation or a subject of study other than medicine.  
142 We excluded 4 datasets for multiple participations. We additionally excluded 12 datasets with  
143 answers to less than 20% of questions. Thus, 126 medical students (79% female,  $M = 24.41$   
144 years,  $SD = 3.47$  years) across all ten semesters of study ( $Median = 5^{\text{th}}$  semester) remained  
145 for analysis. At Uni2, 2,828 medical students were enrolled in the winter term 2021/22

146 resulting in a response rate of 4%. Table 2 shows sample characteristics with tests for  
147 differences between universities.

148 ---TABLE 2 HERE---

### 149 3. Results

150 Our first research question aimed to assess mental and overall health as well as study  
151 demands in medical students. Students generally reported being mentally and overall  
152 healthy. They also reported being satisfied with their lives and their studies. Despite low  
153 mean depression scores ( $M = 3.16$ ;  $SD = 2.75$ ; range 0-10), 111 students (26% of valid  
154 responses) reported depression values above the clinically relevant threshold. Similarly,  
155 mean sleeping difficulty was low ( $M = 3.95$ ;  $SD = 2.55$ ), but only 161 participants (38% of  
156 valid responses) *never* or *rarely* experienced difficulties at all; 115 participants (27% of valid  
157 responses) reported *either* difficulties to fall asleep *or* sleep through the night; and the  
158 remaining 148 participants (35% of valid responses) reported difficulties of falling asleep *and*  
159 sleep through the night. Thus, reduced sleep quality was reported at least sometimes by the  
160 majority of the sample. Students also reported feeling medium exhausted in their studies.  
161 Table 3 shows descriptive statistics of the constructs. Reliability coefficients for all constructs  
162 were satisfying with the exception of self-structuring (Cronbach's  $\alpha = .49$ ).

163 ---TABLE 3 HERE---

164 Our second exploratory question aimed at differences between Uni1 and Uni2. Uni2  
165 students reported higher exhaustion than Uni1 students just short of statistical significance  
166 ( $p = .055$ ). Students reported low to medium study demands with  $3.38 \leq M \leq 5.39$  on a scale  
167 ranging between 0 and 10. The most challenging aspects for both student groups were self-  
168 structuring, learning activities, and performance pressure, however in different orders.  
169 Significant differences were found in combining theory and practice which was more difficult  
170 for Uni2 students than for Uni1 students.

171 Our third exploratory question addressed correlations of constructs. All constructs  
172 regarding mental and overall health were closely related ( $.33 \leq |r| \leq .67$ ;  $p < .01$ ) indicating  
173 that respondents with low overall health also reported worse mental health, more exhaustion,  
174 and more sleep difficulties along with lower life and study satisfaction. All constructs  
175 regarding study demands were closely related ( $.24 \leq |r| \leq .61$ ,  $p < .01$ ), indicating that some  
176 students do well generally in the academic field while others struggle with learning,  
177 organising, and the scientific mode simultaneously. Communication and cooperation with  
178 fellow students showed the lowest correlations with other study demands. Comparing health  
179 and study constructs, mode of science was least associated with mental and overall health.  
180 Emotional exhaustion showed highest correlations with difficulties to cope with study

181 demands. Study satisfaction was more closely related to practical application and study  
182 organisation than to contact with peers. Table 4 shows correlations between the constructs.

183 ---TABLE 4 HERE---

184 Lastly, our fourth research question addressed differences in academic progression.  
185 Advanced medical students reported fewer difficulties to organise their learning and they  
186 suffered less from performance pressure than beginners – but only for Uni1 students. No  
187 differences were observed for Uni2 students. The other study demands did not differ  
188 between beginners and advanced students. Differences between beginners and advanced  
189 students of medicine are shown in Table 5.

190 ---TABLE 5 HERE---

#### 191 **4. Discussion**

192 We studied medical students in two different universities in Germany regarding their  
193 overall and mental health, coping with study demands, and their study and life satisfaction.

194 Results revealed students of both universities reporting good overall and mental health as  
195 well as high satisfaction with their studies and lives. However, 26% students reported  
196 depressive symptoms above the clinically relevant cut-point. This rate was slightly lower than  
197 in a study investigating students at five German universities during the COVID-pandemic  
198 [33], but substantially higher to the general German population, where 10.3% (17-29-year-  
199 olds) and 10.9% (30-39-year-olds) reported elevated depressive symptoms measured with  
200 the PHQ-2 [34]. Sleep difficulties as a particular aspect of mental health were prevalent in the  
201 majority with 62% of respondents reporting sleep disturbances at least sometimes. This  
202 corresponds to 52.7% of 25,735 medical students reporting poor sleep quality that were  
203 included in a meta-analysis [4]. In comparison, 36% of the general German population  
204 reported poor sleep quality [35]. Thus, students reported seemingly conflicting findings of  
205 good overall health and simultaneously more sleep difficulties and depressive symptoms  
206 than the general population. However, sleep as a specific measure can be seen as an early  
207 indicator of mental health difficulties compared to manifest depressive symptoms or declined  
208 overall health. We thus suggest to intervene early to interrupt a pathway from current early  
209 indicators of stress and struggle towards chronified versions of stress and struggle.

210 Study demands most difficult to cope with were learning activities ( $M = 5.31$ ), self-  
211 structuring ( $M = 4.61$ ), and performance pressure ( $M = 4.45$ ). These three demands were  
212 also the most difficult to cope with in the representative samples of Jänsch and Bosse [18]  
213 across degree programmes with somewhat lower POMP-scores ( $M_{LA} = 4.60$ ;  $M_{SS} = 3.93$ ;  
214  $M_{PP} = 4.30$ ). We observed significant differences between the two universities only regarding

215 Uni1 students reporting lower difficulties to combine theory and practice than Uni2 students.  
216 For both universities, more difficulties combining theory and practice were relatively strongly  
217 correlated with depression ( $r = .31$ ), emotional exhaustion ( $r = .43$ ), and study satisfaction  
218 ( $r = -.48$ ).

219 Differences between beginners and advanced students to cope with study demands were  
220 inconclusive. Advanced students had lower difficulties to cope with learning activities and  
221 performance pressure at Uni1, but not at Uni2 – all other study demands did not yield  
222 differences in study progression. These differences can be explained via experience –  
223 advanced students have built up a wealth of experience in exam situations and can better  
224 assess their expectations and competencies compared to beginners.

225 Surprisingly, academic progress did not correspond to better assessment of contact and  
226 cooperation between students at either university. First to third semester students in winter  
227 term 2021 had primarily experienced online teaching whereas their more experienced  
228 counterparts studied the majority of their academic career in-person. Yet, online teaching  
229 with fewer opportunities to get in contact with fellow students did not compromise the social  
230 embeddedness in beginners compared to advanced students.

231 With our findings, we did not replicate the results of previous studies presenting medical  
232 students as depressed, overworked, exhausted, and with low quality of life [1-3, 5]. However,  
233 sleep difficulties reported in the literature [4] were also prevalent in our sample. We thus  
234 suggest to develop and offer programmes for students supporting their mental health with  
235 particular focus on sleep.

236 Mental and overall health were correlated, as well as the constructs of study demands.  
237 This suggests that some students struggle particularly whereas others are able to cope with  
238 study demands more easily. This supports the call to identify vulnerable, struggling students  
239 to provide adequate, individual support in their studies.

#### 240 **4.1 Limitations**

241 Convenience samples were used for both universities; we invited students to participate  
242 via e-mail lists and social media activities of the student unions. Thus, particularly students  
243 who are keen to provide feedback on their study experience were inclined to answer  
244 presenting selection bias. Despite convenience sampling, gender ratios, age, and median  
245 semester of studies were representative of the student body and did not differ between the  
246 two universities. We are thus confident that our findings are informative for the respective  
247 study populations.



248

## 5. Conclusions

249 Our sample was rather resilient regarding mental health and coping with study demands.  
250 Curricular influence on our outcomes seemed comparatively minor, which might result from  
251 increased online teaching during the pandemic. We suggest to focus on learning strategies  
252 for beginners and strategies for stress reduction to address, among other things, the reported  
253 sleep difficulties.

254

## Acknowledgements

255 The authors would like to thank Luise Chassol from the Uni1 student union for support in  
256 finalising the questionnaire and Wiebke Höppner from the Uni1 dean's office for supporting  
257 student recruitment. The authors would also like to thank the Uni1 student assistants Anton  
258 Horeis and Janek Wilhelm for survey programming and data cleaning.

259

## Contributions statement

260 AV, SD, and JZ developed the study design and questionnaire, and collected the data; JZ  
261 analysed the data and created the first manuscript draft; all authors interpreted the data and  
262 substantively revised the manuscript; all authors read and approved the final manuscript.

263

## Declaration of Interest Statement

264 The authors report there are no competing interests to declare.

265

## Funding

266 None.

267

## References

- 268 1. Puthran R, Zhang MW, Tam WW, Ho RC. Prevalence of depression amongst medical  
269 students: A meta-analysis. *Medical Education*. 2016;50(4):456-68.
- 270 2. Voltmer E, Kieschke U, Spahn C. Studienbezogenes psychosoziales Verhalten und  
271 Erleben von Medizinstudenten im ersten und fünften Studienjahr. *Das Gesundheitswesen*.  
272 2008;70(02):98-104.
- 273 3. Frajerman A, Morvan Y, Krebs M-O, Gorwood P, Chaumette B. Burnout in medical  
274 students before residency: A systematic review and meta-analysis. *European Psychiatry*.  
275 2019;55:36-42.
- 276 4. Rao W-W, Li W, Qi H, Hong L, Chen C, Li C-Y, et al. Sleep quality in medical  
277 students: A comprehensive meta-analysis of observational studies. *Sleep and Breathing*.  
278 2020;24(3):1151-65.
- 279 5. Kurth RA, Klier S, Pokorny D, Jurkat HB, Reimer C. Studienbezogene Belastungen,  
280 Lebensqualität und Beziehungserleben bei Medizinstudenten. *Psychotherapeut*.  
281 2007;52(5):355-61.
- 282 6. Kroher M, Beuße M, Isleib S, Becker K, Ehrhardt M-C, Gerdes F, et al. Die  
283 Studierendenbefragung in Deutschland: 22. Sozialerhebung. Die wirtschaftliche und soziale  
284 Lage der Studierenden in Deutschland 2021 Berlin: Bundesministerium für Bildung und  
285 Forschung (BMBF); 2023 [Available from:  
286 [https://www.bmbf.de/SharedDocs/Publikationen/de/bmbf/4/31790\\_22\\_Sozialerhebung\\_2021.pdf?\\_\\_blob=publicationFile&v=9](https://www.bmbf.de/SharedDocs/Publikationen/de/bmbf/4/31790_22_Sozialerhebung_2021.pdf?__blob=publicationFile&v=9).  
287
- 288 7. Molodynski A, Lewis T, Kadhum M, Farrell SM, Lemtiri Chelieh M, Falcão De Almeida  
289 T, et al. Cultural variations in wellbeing, burnout and substance use amongst medical  
290 students in twelve countries. *International Review of Psychiatry*. 2021;33(1-2):37-42.
- 291 8. Bransi A, Winter L, Glahn A, Kahl KG. Abhängigkeitserkrankungen bei Ärzten. *Der*  
292 *Nervenarzt*. 2020;91(1):77-90.
- 293 9. Liu RQ, Davidson J, Van Hooren TA, Van Koughnett JAM, Jones S, Ott MC.  
294 Impostorism and anxiety contribute to burnout among resident physicians. *Medical Teacher*.  
295 2022;44(7):758-64.
- 296 10. Hennig L, Strack M, Boos M, Reich G. Soziale Unterstützung und psychisches  
297 Befinden von Studierenden. *Psychotherapeut*. 2017;62(5):431–5.
- 298 11. Kirsch A-S, Laemmert P, Tittlbach S. Gesundheitliche Anforderungen und  
299 Ressourcen von Studierenden. Eine Studie mit Studierenden der Sportökonomie. *Prävention*  
300 *und Gesundheitsförderung*. 2017;12:181-8.
- 301 12. Garriott PO, Nisle S. Stress, coping, and perceived academic goal progress in first-  
302 generation college students: The role of institutional supports. *Journal of Diversity in Higher*  
303 *Education*. 2018;11(4):436.
- 304 13. Ferguson E, James D, Madeley L. Factors associated with success in medical school:  
305 systematic review of the literature. *BMJ*. 2002;324(7343):952-7.
- 306 14. Healy C, Ryan Á, Moran CN, Harkin DW, Doyle F, Hickey A. Medical students, mental  
307 health and the role of resilience – A cross-sectional study. *Medical Teacher*. 2023;45(1):40-8.

- 308 15. Backmann J, Weiss M, Schippers MC, Hoegl M. Personality factors, student  
309 resiliency, and the moderating role of achievement values in study progress. *Learning and*  
310 *Individual Differences*. 2019;72:39-48.
- 311 16. Neufeld A, Mossière A, Malin G. Basic psychological needs, more than mindfulness  
312 and resilience, relate to medical student stress: A case for shifting the focus of wellness  
313 curricula. *Medical Teacher*. 2020;42(12):1401-12.
- 314 17. Waechter R, Stahl G, Rabie S, Colak B, Johnson-Rais D, Landon B, et al. Mitigating  
315 medical student stress and anxiety: Should schools mandate participation in wellness  
316 intervention programs? *Medical Teacher*. 2021;43(8):945-55.
- 317 18. Jänsch VK, Bosse E. Messinstrument für die Wahrnehmung von  
318 Studienanforderungen. *Zusammenstellung sozialwissenschaftlicher Items und Skalen (ZIS)*.  
319 2018.
- 320 19. Billett S. Curriculum considerations. The integration of experiences. In: Billett S,  
321 editor. *Integrating practice-based experiences into higher education*. New York: Springer;  
322 2015. p. 161-94.
- 323 20. Kiessling C, Rotthoff T, Schnabel KP, Stosch C, Begenau J. 20 years of model  
324 curricula in German-speaking countries. *GMS Journal for Medical Education*.  
325 2019;36(5):Doc65.
- 326 21. Biggs JB. From theory to practice: A cognitive systems approach. *Higher Education*  
327 *Research and Development*. 1993;12(1):73-85.
- 328 22. Schauber SK, Hecht M, Nouns ZM, Kuhlmeier A, Dettmer S. The role of environmental  
329 and individual characteristics in the development of student achievement: A comparison  
330 between a traditional and a problem-based-learning curriculum. *Advances in Health*  
331 *Sciences Education*. 2015;20(4):1033-52.
- 332 23. Bosch J. *Erfolgreich studieren in der Humanmedizin. Ein Vergleich von traditionellen*  
333 *und reformierten Studiengängen an der Charité–Universitätsmedizin Berlin*. Berlin: Freie  
334 *Universität Berlin (Germany)*; 2020.
- 335 24. Dettmer S, Kuhlmeier A. Studienzufriedenheit und berufliche Zukunftsplanung von  
336 Medizinstudierenden - ein Vergleich zweier Ausbildungskonzepte. In: Schwartz FW, Angerer  
337 P, editors. *Arbeitsbedingungen und Befinden von Ärztinnen und Ärzten Report*  
338 *Versorgungsforschung*. 2. Berlin: Deutscher Ärzte-Verlag; 2010. p. 103-15.
- 339 25. Carrard V, Bourquin C, Berney S, Schlegel K, Gaume J, Bart P-A, et al. The  
340 relationship between medical students' empathy, mental health, and burnout: A cross-  
341 sectional study. *Medical Teacher*. 2022;44(12):1392-9.
- 342 26. Agarwal G, Mosquera M, Ring M, Victorson D. Work engagement in medical  
343 students: An exploratory analysis of the relationship between engagement, burnout,  
344 perceived stress, lifestyle factors, and medical student attitudes. *Medical Teacher*.  
345 2020;42(3):299-305.
- 346 27. Veer IM, Riepenhausen A, Zerban M, Wackerhagen C, Puhlmann L, Engen H, et al.  
347 Psycho-social factors associated with mental resilience in the Corona lockdown.  
348 *Translational Psychiatry*. 2021;11(1):1-11.

- 349 28. Bewick B, Koutsopoulou G, Miles J, Slaa E, Barkham M. Changes in undergraduate  
350 students' psychological well-being as they progress through university. *Studies in Higher*  
351 *Education*. 2010;35(6):633-45.
- 352 29. Pluut H, Curşeu PL, Ilies R. Social and study related stressors and resources among  
353 university entrants: Effects on well-being and academic performance. *Learning and Individual*  
354 *Differences*. 2015;37:262-8.
- 355 30. Grohne P, Wenig V, Pischke CR, Matos Fialho PM, Negash S, Niephaus Y, et al.  
356 Genderspezifische Unterschiede depressiver Symptome von Studienanfänger\*innen  
357 während der COVID-19-Pandemie. *Prävention und Gesundheitsförderung*. 2024.
- 358 31. Cohen P, Cohen J, Aiken LS, West SG. The problem of units and the circumstance  
359 for POMP. *Multivariate Behavioral Research*. 1999;34(3):315-46.
- 360 32. Löwe B, Kroenke K, Gräfe K. Detecting and monitoring depression with a two-item  
361 questionnaire (PHQ-2). *Journal of Psychosomatic Research*. 2005;58(2):163-71.
- 362 33. Heumann E, Helmer SM, Busse H, Negash S, Horn J, Pischke CR, et al. Anxiety and  
363 depressive symptoms of German university students 20 months after the COVID-19 outbreak  
364 - A cross-sectional study. *Journal of Affective Disorders*. 2023;320:568-75.
- 365 34. Hajek A, König H-H. Prevalence and correlates of individuals screening positive for  
366 depression and anxiety on the PHQ-4 in the German general population: Findings from the  
367 nationally representative German Socio-Economic Panel (GSOEP). *International Journal of*  
368 *Environmental Research and Public Health*. 2020;17(21):7865.
- 369 35. Hinz A, Glaesmer H, Brähler E, Löffler M, Engel C, Enzenbach C, et al. Sleep quality  
370 in the general population: Psychometric properties of the Pittsburgh Sleep Quality Index,  
371 derived from a German community sample of 9284 people. *Sleep Medicine*. 2017;30:57-63.
- 372 36. American Psychiatric Association. *Diagnostic and statistical manual of mental*  
373 *disorders*: American Psychiatric Publishing Inc.; 2000.
- 374 37. Demerouti E, Bakker AB, Vardakou I, Kantas A. The convergent validity of two  
375 burnout instruments: A multitrait-multimethod analysis. *European Journal of Psychological*  
376 *Assessment*. 2003;19(1):12-23.
- 377 38. Beierlein C, Kovaleva A, László Z, Kemper CJ, Rammstedt B. Kurzsкала zur  
378 Erfassung der Allgemeinen Lebenszufriedenheit (L-1). *Zusammenstellung*  
379 *sozialwissenschaftlicher Items und Skalen (ZIS)*. 2015.
- 380

Table 1.

*Definition of constructs.*

| Construct                                  | Method       | Range    | Definition                                                                                                                                                                               |
|--------------------------------------------|--------------|----------|------------------------------------------------------------------------------------------------------------------------------------------------------------------------------------------|
| Difficulties regarding study demands in... |              |          |                                                                                                                                                                                          |
| ...mode of science                         | MWS [18]     | 1 to 5   | Demands regarding the study content related to scientific language and thinking [18]                                                                                                     |
| ...learning activities                     | MWS [18]     | 1 to 5   | Personal demands linked to organising learning and studying [18]                                                                                                                         |
| ... self-structuring                       | MWS [18]     | 1 to 5   | Organisational demands to structure contextual aspects of studying, e.g., assembling a study schedule [18]                                                                               |
| ... contact and cooperation                | MWS [18]     | 1 to 5   | Social demands resulting from teamwork activities and forming bonds with other students [18]                                                                                             |
| ... performance pressure and failure       | MWS [18]     | 1 to 5   | Personal demands to cope with exam results or stress during exam preparation [18]                                                                                                        |
| ... combining theory and practice          | MWS [18]     | 1 to 5   | Demands related to linking study contents to future occupation topics [18]                                                                                                               |
| Depression                                 | PHQ-2 [32]   | 0 to 3   | “a period of at least 2 weeks during which there is either depressed mood or the loss of interest or pleasure in nearly all activities.” [36]                                            |
| Emotional exhaustion                       | OLBI [37]    | 1 to 4   | “a consequence of intensive physical, affective, and cognitive strain, i. e., as a longterm consequence of prolonged exposure to certain job demands” [37]                               |
| Sleep difficulty                           | Self-devised | 1 to 5   | “Dyssomnias are primary disorders of initiating or maintaining sleep or of excessive sleepiness and are characterized by a disturbance in the amount, quality, or timing of sleep.” [36] |
| Health status                              | Single item  | 1 to 5   | Assessment of one’s own health (“How is your health status generally?”)                                                                                                                  |
| Life satisfaction                          | L-1 [38]     | 0 to 100 | “cognitive process of assessing one’s own wellbeing” [38]                                                                                                                                |
| Study satisfaction                         | Single item  | 1 to 5   | Appraisal of students’ study experience (“How satisfied are you overall with your study?”)                                                                                               |

381 *Note.* The column range depicts the value range used in this study. After data collection, all  
382 constructs were transformed into POMP-scores [31] with a range 0 (few difficulties in study  
383 demands, low depression scores, low exhaustion, few sleep difficulties, bad health, and low  
384 life and study satisfaction,) to 10 (many difficulties in study demands, high depression  
385 scores, high exhaustion, many sleep difficulties, good health, and high life and study  
386 satisfaction).

Table 2

*Sample characteristics*

|                  | Uni1         | Uni2         | t / $\chi^2$ | p    | d    |
|------------------|--------------|--------------|--------------|------|------|
| N                | 357          | 126          |              |      |      |
| Age (M, SD)      | 24.83 (4.99) | 23.39 (3.47) | 3.53         | .000 | 0.31 |
| Gender (% women) | 71%          | 79%          | 3.98         | .137 | -    |
| Semester (M, SD) | 5.31 (3.13)  | 4.98 (2.62)  | 1.15         | .252 | -    |

387 *Note.* M = mean; SD = standard deviation; t = t-value for age and semester;  $\chi^2$  = Chi-square  
388 value for gender; p = p-value test statistics; d = Cohen's d

Table 3

*Descriptive results of mental and overall health, study satisfaction, and study demands*

| Construct                        | Range | N                                    | <i>M</i>     | <i>SD</i>    | $\alpha$ | <i>t</i> | <i>p</i> |
|----------------------------------|-------|--------------------------------------|--------------|--------------|----------|----------|----------|
| Mode of science                  | 0-10  | 318 <sup>a</sup><br>113 <sup>b</sup> | 4.06<br>3.87 | 2.26<br>2.33 | .78      | 0.78     | .437     |
| Learning activities              | 0-10  | 319 <sup>a</sup><br>113 <sup>b</sup> | 5.28<br>5.39 | 2.18<br>2.21 | .78      | -0.44    | .660     |
| Self-structuring                 | 0-10  | 319 <sup>a</sup><br>113 <sup>b</sup> | 4.67<br>4.42 | 2.06<br>1.86 | .49      | 1.14     | .254     |
| Contact and cooperation          | 0-10  | 319 <sup>a</sup><br>113 <sup>b</sup> | 4.36<br>4.02 | 2.10<br>2.17 | .69      | 1.47     | .143     |
| Performance pressure and failure | 0-10  | 319 <sup>a</sup><br>113 <sup>b</sup> | 4.35<br>4.73 | 2.26<br>2.26 | .74      | -1.51    | .132     |
| Combining theory and practice    | 0-10  | 319 <sup>a</sup><br>113 <sup>b</sup> | 3.38<br>4.17 | 2.05<br>2.06 | .70      | -3.53    | .000     |
| Depression                       | 0-10  | 312 <sup>a</sup><br>113 <sup>b</sup> | 3.19<br>3.10 | 2.82<br>2.53 | .87      | 0.30     | .761     |
| Emotional exhaustion             | 0-10  | 315 <sup>a</sup><br>114 <sup>b</sup> | 5.35<br>5.75 | 2.03<br>1.84 | .87      | -1.84    | .055     |
| Sleep difficulty                 | 0-10  | 312 <sup>a</sup><br>114              | 3.91<br>4.06 | 2.57<br>2.49 | .69      | -0.54    | .589     |
| Health status                    | 0-10  | 317 <sup>a</sup><br>113 <sup>b</sup> | 7.33<br>7.48 | 2.34<br>1.96 | -        | -0.63    | .527     |
| Life satisfaction                | 0-10  | 319 <sup>a</sup><br>113 <sup>b</sup> | 6.58<br>6.55 | 2.28<br>2.11 | -        | 0.11     | .910     |
| Study satisfaction               | 0-10  | 331<br>115                           | 6.75<br>6.50 | 2.37<br>2.29 | -        | 0.99     | .332     |

389 *Note.* *M* = mean; *SD* = standard deviation;  $\alpha$  = internal consistency (Cronbach's alpha);  
 390 *t* = t-value for difference between Uni1 and Uni2 students; *p* = p-value for t-tests;  
 391 <sup>a</sup> = Uni1 students; <sup>b</sup> = Uni2 students; Effect size for combining theory and practice: *d* = 0.39.  
 392 Health status, life satisfaction, and study satisfaction were each measured with a single item,  
 393 so Cronbach's  $\alpha$  could not be calculated.

Table 4

*Correlations between study demands, mental and overall health, and study satisfaction.*

|                                    | 1      | 2      | 3      | 4      | 5      | 6      | 7      | 8      | 9      | 10    | 11    | 12 |
|------------------------------------|--------|--------|--------|--------|--------|--------|--------|--------|--------|-------|-------|----|
| 1 Mode of science                  | -      |        |        |        |        |        |        |        |        |       |       |    |
| 2 Learning activities              | .37**  | -      |        |        |        |        |        |        |        |       |       |    |
| 3 Self-structuring                 | .35**  | .49**  | -      |        |        |        |        |        |        |       |       |    |
| 4 Contact and cooperation          | .26**  | .35**  | .34**  | -      |        |        |        |        |        |       |       |    |
| 5 Performance pressure and failure | .39**  | .61**  | .45**  | .27**  | -      |        |        |        |        |       |       |    |
| 6 Combining theory and practice    | .31**  | .38**  | .37**  | .24**  | .35**  | -      |        |        |        |       |       |    |
| 7 Depression                       | -.12*  | .40**  | .30**  | .30**  | .35**  | .31**  | -      |        |        |       |       |    |
| 8 Emotional exhaustion             | .29**  | .65**  | .46**  | .28**  | .54**  | .43**  | .55**  | -      |        |       |       |    |
| 9 Sleep difficulty                 | .11*   | .30**  | .21**  | .20**  | .29**  | .16**  | .40**  | .41**  | -      |       |       |    |
| 10 Health status                   | -.12*  | -.30** | -.19** | -.23** | -.30** | -.17** | -.46** | -.44** | -.41** | -     |       |    |
| 11 Life satisfaction               | -.18** | -.41** | -.33** | -.30** | -.30** | -.34*  | -.67** | -.50** | -.33** | .52** | -     |    |
| 12 Study satisfaction              | -.21** | -.34** | -.40** | -.21** | -.29** | -.48** | -.32** | -.44** | -.24** | .32** | .51** | -  |

394 Note.  $420 \leq N \leq 432$ ; \* $p < .05$ ; \*\* $p < .01$



Table 5

*Differences between universities and between beginners and advanced students*

| Construct                        | University | N                | M    | SD   | t     | p    | d    |                                  |      |                  |      |      |       |      |      |                 |      |      |                                  |      |                  |      |      |       |      |      |                 |      |      |                                  |      |                  |      |      |       |      |      |                 |      |      |                                  |      |                  |      |      |       |      |      |                 |      |      |                                  |      |                  |      |      |       |      |      |                 |      |      |                                  |      |                  |      |      |       |      |      |                 |      |      |                                  |      |                  |      |      |       |      |      |                 |      |      |                                  |      |                  |      |      |       |      |      |                 |      |      |                               |      |                  |      |      |       |      |   |                 |      |      |                               |      |                  |      |      |       |      |   |                 |      |      |  |      |                 |      |      |       |
|----------------------------------|------------|------------------|------|------|-------|------|------|----------------------------------|------|------------------|------|------|-------|------|------|-----------------|------|------|----------------------------------|------|------------------|------|------|-------|------|------|-----------------|------|------|----------------------------------|------|------------------|------|------|-------|------|------|-----------------|------|------|----------------------------------|------|------------------|------|------|-------|------|------|-----------------|------|------|----------------------------------|------|------------------|------|------|-------|------|------|-----------------|------|------|----------------------------------|------|------------------|------|------|-------|------|------|-----------------|------|------|----------------------------------|------|------------------|------|------|-------|------|------|-----------------|------|------|----------------------------------|------|------------------|------|------|-------|------|------|-----------------|------|------|-------------------------------|------|------------------|------|------|-------|------|---|-----------------|------|------|-------------------------------|------|------------------|------|------|-------|------|---|-----------------|------|------|--|------|-----------------|------|------|-------|
| Mode of science                  | Uni1       | 108 <sup>a</sup> | 3.94 | 2.03 | -0.75 | .457 | -    |                                  |      |                  |      |      |       |      |      |                 |      |      |                                  |      |                  |      |      |       |      |      |                 |      |      |                                  |      |                  |      |      |       |      |      |                 |      |      |                                  |      |                  |      |      |       |      |      |                 |      |      |                                  |      |                  |      |      |       |      |      |                 |      |      |                                  |      |                  |      |      |       |      |      |                 |      |      |                                  |      |                  |      |      |       |      |      |                 |      |      |                                  |      |                  |      |      |       |      |      |                 |      |      |                               |      |                  |      |      |       |      |   |                 |      |      |                               |      |                  |      |      |       |      |   |                 |      |      |  |      |                 |      |      |       |
|                                  |            | 94 <sup>b</sup>  | 4.17 | 2.40 |       |      |      |                                  | Uni2 | 34 <sup>a</sup>  | 3.76 | 2.46 | -1.67 | .102 | -    | 22 <sup>b</sup> | 4.81 | 2.02 | Learning activities              | Uni1 | 108 <sup>a</sup> | 5.63 | 2.02 | 2.66  | .008 | 0.38 | 94 <sup>b</sup> | 4.83 | 2.24 |                                  | Uni2 | 34 <sup>a</sup>  | 5.48 | 2.19 | 0.09  | .930 | -    | 22 <sup>b</sup> | 5.42 | 2.12 | Self-structuring                 | Uni1 | 108 <sup>a</sup> | 4.63 | 2.14 | -0.23 | .818 | -    | 94 <sup>b</sup> | 4.70 | 2.10 |                                  | Uni2 | 34 <sup>a</sup>  | 4.20 | 1.80 | -0.93 | .358 | -    | 22 <sup>b</sup> | 4.66 | 1.79 | Contact and cooperation          | Uni1 | 108 <sup>a</sup> | 4.12 | 2.03 | -0.89 | .377 | -    | 94 <sup>b</sup> | 4.40 | 2.35 |                                  | Uni2 | 34 <sup>a</sup>  | 4.48 | 2.31 | 0.56  | .581 | -    | 22 <sup>b</sup> | 4.13 | 2.39 | Performance pressure and failure | Uni1 | 108 <sup>a</sup> | 4.74 | 2.26 | 2.85  | .005 | 0.40 | 94 <sup>b</sup> | 3.82 | 2.35 |                               | Uni2 | 34 <sup>a</sup>  | 4.64 | 2.56 | -0.08 | .468 | - | 22 <sup>b</sup> | 4.70 | 2.14 | Combining theory and practice | Uni1 | 108 <sup>a</sup> | 3.16 | 1.95 | -1.09 | .282 | - | 94 <sup>b</sup> | 3.48 | 2.22 |  | Uni2 | 34 <sup>a</sup> | 3.85 | 2.11 | -1.43 |
|                                  | Uni2       | 34 <sup>a</sup>  | 3.76 | 2.46 | -1.67 | .102 | -    |                                  |      |                  |      |      |       |      |      |                 |      |      |                                  |      |                  |      |      |       |      |      |                 |      |      |                                  |      |                  |      |      |       |      |      |                 |      |      |                                  |      |                  |      |      |       |      |      |                 |      |      |                                  |      |                  |      |      |       |      |      |                 |      |      |                                  |      |                  |      |      |       |      |      |                 |      |      |                                  |      |                  |      |      |       |      |      |                 |      |      |                                  |      |                  |      |      |       |      |      |                 |      |      |                               |      |                  |      |      |       |      |   |                 |      |      |                               |      |                  |      |      |       |      |   |                 |      |      |  |      |                 |      |      |       |
|                                  |            | 22 <sup>b</sup>  | 4.81 | 2.02 |       |      |      | Learning activities              | Uni1 | 108 <sup>a</sup> | 5.63 | 2.02 | 2.66  | .008 | 0.38 | 94 <sup>b</sup> | 4.83 | 2.24 |                                  | Uni2 | 34 <sup>a</sup>  | 5.48 | 2.19 | 0.09  | .930 | -    | 22 <sup>b</sup> | 5.42 | 2.12 | Self-structuring                 | Uni1 | 108 <sup>a</sup> | 4.63 | 2.14 | -0.23 | .818 | -    | 94 <sup>b</sup> | 4.70 | 2.10 |                                  | Uni2 | 34 <sup>a</sup>  | 4.20 | 1.80 | -0.93 | .358 | -    | 22 <sup>b</sup> | 4.66 | 1.79 | Contact and cooperation          | Uni1 | 108 <sup>a</sup> | 4.12 | 2.03 | -0.89 | .377 | -    | 94 <sup>b</sup> | 4.40 | 2.35 |                                  | Uni2 | 34 <sup>a</sup>  | 4.48 | 2.31 | 0.56  | .581 | -    | 22 <sup>b</sup> | 4.13 | 2.39 | Performance pressure and failure | Uni1 | 108 <sup>a</sup> | 4.74 | 2.26 | 2.85  | .005 | 0.40 | 94 <sup>b</sup> | 3.82 | 2.35 |                                  | Uni2 | 34 <sup>a</sup>  | 4.64 | 2.56 | -0.08 | .468 | -    | 22 <sup>b</sup> | 4.70 | 2.14 | Combining theory and practice | Uni1 | 108 <sup>a</sup> | 3.16 | 1.95 | -1.09 | .282 | - | 94 <sup>b</sup> | 3.48 | 2.22 |                               | Uni2 | 34 <sup>a</sup>  | 3.85 | 2.11 | -1.43 | .079 | - | 22 <sup>b</sup> | 4.72 | 2.37 |  |      |                 |      |      |       |
| Learning activities              | Uni1       | 108 <sup>a</sup> | 5.63 | 2.02 | 2.66  | .008 | 0.38 |                                  |      |                  |      |      |       |      |      |                 |      |      |                                  |      |                  |      |      |       |      |      |                 |      |      |                                  |      |                  |      |      |       |      |      |                 |      |      |                                  |      |                  |      |      |       |      |      |                 |      |      |                                  |      |                  |      |      |       |      |      |                 |      |      |                                  |      |                  |      |      |       |      |      |                 |      |      |                                  |      |                  |      |      |       |      |      |                 |      |      |                                  |      |                  |      |      |       |      |      |                 |      |      |                               |      |                  |      |      |       |      |   |                 |      |      |                               |      |                  |      |      |       |      |   |                 |      |      |  |      |                 |      |      |       |
|                                  |            | 94 <sup>b</sup>  | 4.83 | 2.24 |       |      |      |                                  | Uni2 | 34 <sup>a</sup>  | 5.48 | 2.19 | 0.09  | .930 | -    | 22 <sup>b</sup> | 5.42 | 2.12 | Self-structuring                 | Uni1 | 108 <sup>a</sup> | 4.63 | 2.14 | -0.23 | .818 | -    | 94 <sup>b</sup> | 4.70 | 2.10 |                                  | Uni2 | 34 <sup>a</sup>  | 4.20 | 1.80 | -0.93 | .358 | -    | 22 <sup>b</sup> | 4.66 | 1.79 | Contact and cooperation          | Uni1 | 108 <sup>a</sup> | 4.12 | 2.03 | -0.89 | .377 | -    | 94 <sup>b</sup> | 4.40 | 2.35 |                                  | Uni2 | 34 <sup>a</sup>  | 4.48 | 2.31 | 0.56  | .581 | -    | 22 <sup>b</sup> | 4.13 | 2.39 | Performance pressure and failure | Uni1 | 108 <sup>a</sup> | 4.74 | 2.26 | 2.85  | .005 | 0.40 | 94 <sup>b</sup> | 3.82 | 2.35 |                                  | Uni2 | 34 <sup>a</sup>  | 4.64 | 2.56 | -0.08 | .468 | -    | 22 <sup>b</sup> | 4.70 | 2.14 | Combining theory and practice    | Uni1 | 108 <sup>a</sup> | 3.16 | 1.95 | -1.09 | .282 | -    | 94 <sup>b</sup> | 3.48 | 2.22 |                               | Uni2 | 34 <sup>a</sup>  | 3.85 | 2.11 | -1.43 | .079 | - | 22 <sup>b</sup> | 4.72 | 2.37 |                               |      |                  |      |      |       |      |   |                 |      |      |  |      |                 |      |      |       |
|                                  | Uni2       | 34 <sup>a</sup>  | 5.48 | 2.19 | 0.09  | .930 | -    |                                  |      |                  |      |      |       |      |      |                 |      |      |                                  |      |                  |      |      |       |      |      |                 |      |      |                                  |      |                  |      |      |       |      |      |                 |      |      |                                  |      |                  |      |      |       |      |      |                 |      |      |                                  |      |                  |      |      |       |      |      |                 |      |      |                                  |      |                  |      |      |       |      |      |                 |      |      |                                  |      |                  |      |      |       |      |      |                 |      |      |                                  |      |                  |      |      |       |      |      |                 |      |      |                               |      |                  |      |      |       |      |   |                 |      |      |                               |      |                  |      |      |       |      |   |                 |      |      |  |      |                 |      |      |       |
|                                  |            | 22 <sup>b</sup>  | 5.42 | 2.12 |       |      |      | Self-structuring                 | Uni1 | 108 <sup>a</sup> | 4.63 | 2.14 | -0.23 | .818 | -    | 94 <sup>b</sup> | 4.70 | 2.10 |                                  | Uni2 | 34 <sup>a</sup>  | 4.20 | 1.80 | -0.93 | .358 | -    | 22 <sup>b</sup> | 4.66 | 1.79 | Contact and cooperation          | Uni1 | 108 <sup>a</sup> | 4.12 | 2.03 | -0.89 | .377 | -    | 94 <sup>b</sup> | 4.40 | 2.35 |                                  | Uni2 | 34 <sup>a</sup>  | 4.48 | 2.31 | 0.56  | .581 | -    | 22 <sup>b</sup> | 4.13 | 2.39 | Performance pressure and failure | Uni1 | 108 <sup>a</sup> | 4.74 | 2.26 | 2.85  | .005 | 0.40 | 94 <sup>b</sup> | 3.82 | 2.35 |                                  | Uni2 | 34 <sup>a</sup>  | 4.64 | 2.56 | -0.08 | .468 | -    | 22 <sup>b</sup> | 4.70 | 2.14 | Combining theory and practice    | Uni1 | 108 <sup>a</sup> | 3.16 | 1.95 | -1.09 | .282 | -    | 94 <sup>b</sup> | 3.48 | 2.22 |                                  | Uni2 | 34 <sup>a</sup>  | 3.85 | 2.11 | -1.43 | .079 | -    | 22 <sup>b</sup> | 4.72 | 2.37 |                               |      |                  |      |      |       |      |   |                 |      |      |                               |      |                  |      |      |       |      |   |                 |      |      |  |      |                 |      |      |       |
| Self-structuring                 | Uni1       | 108 <sup>a</sup> | 4.63 | 2.14 | -0.23 | .818 | -    |                                  |      |                  |      |      |       |      |      |                 |      |      |                                  |      |                  |      |      |       |      |      |                 |      |      |                                  |      |                  |      |      |       |      |      |                 |      |      |                                  |      |                  |      |      |       |      |      |                 |      |      |                                  |      |                  |      |      |       |      |      |                 |      |      |                                  |      |                  |      |      |       |      |      |                 |      |      |                                  |      |                  |      |      |       |      |      |                 |      |      |                                  |      |                  |      |      |       |      |      |                 |      |      |                               |      |                  |      |      |       |      |   |                 |      |      |                               |      |                  |      |      |       |      |   |                 |      |      |  |      |                 |      |      |       |
|                                  |            | 94 <sup>b</sup>  | 4.70 | 2.10 |       |      |      |                                  | Uni2 | 34 <sup>a</sup>  | 4.20 | 1.80 | -0.93 | .358 | -    | 22 <sup>b</sup> | 4.66 | 1.79 | Contact and cooperation          | Uni1 | 108 <sup>a</sup> | 4.12 | 2.03 | -0.89 | .377 | -    | 94 <sup>b</sup> | 4.40 | 2.35 |                                  | Uni2 | 34 <sup>a</sup>  | 4.48 | 2.31 | 0.56  | .581 | -    | 22 <sup>b</sup> | 4.13 | 2.39 | Performance pressure and failure | Uni1 | 108 <sup>a</sup> | 4.74 | 2.26 | 2.85  | .005 | 0.40 | 94 <sup>b</sup> | 3.82 | 2.35 |                                  | Uni2 | 34 <sup>a</sup>  | 4.64 | 2.56 | -0.08 | .468 | -    | 22 <sup>b</sup> | 4.70 | 2.14 | Combining theory and practice    | Uni1 | 108 <sup>a</sup> | 3.16 | 1.95 | -1.09 | .282 | -    | 94 <sup>b</sup> | 3.48 | 2.22 |                                  | Uni2 | 34 <sup>a</sup>  | 3.85 | 2.11 | -1.43 | .079 | -    | 22 <sup>b</sup> | 4.72 | 2.37 |                                  |      |                  |      |      |       |      |      |                 |      |      |                               |      |                  |      |      |       |      |   |                 |      |      |                               |      |                  |      |      |       |      |   |                 |      |      |  |      |                 |      |      |       |
|                                  | Uni2       | 34 <sup>a</sup>  | 4.20 | 1.80 | -0.93 | .358 | -    |                                  |      |                  |      |      |       |      |      |                 |      |      |                                  |      |                  |      |      |       |      |      |                 |      |      |                                  |      |                  |      |      |       |      |      |                 |      |      |                                  |      |                  |      |      |       |      |      |                 |      |      |                                  |      |                  |      |      |       |      |      |                 |      |      |                                  |      |                  |      |      |       |      |      |                 |      |      |                                  |      |                  |      |      |       |      |      |                 |      |      |                                  |      |                  |      |      |       |      |      |                 |      |      |                               |      |                  |      |      |       |      |   |                 |      |      |                               |      |                  |      |      |       |      |   |                 |      |      |  |      |                 |      |      |       |
|                                  |            | 22 <sup>b</sup>  | 4.66 | 1.79 |       |      |      | Contact and cooperation          | Uni1 | 108 <sup>a</sup> | 4.12 | 2.03 | -0.89 | .377 | -    | 94 <sup>b</sup> | 4.40 | 2.35 |                                  | Uni2 | 34 <sup>a</sup>  | 4.48 | 2.31 | 0.56  | .581 | -    | 22 <sup>b</sup> | 4.13 | 2.39 | Performance pressure and failure | Uni1 | 108 <sup>a</sup> | 4.74 | 2.26 | 2.85  | .005 | 0.40 | 94 <sup>b</sup> | 3.82 | 2.35 |                                  | Uni2 | 34 <sup>a</sup>  | 4.64 | 2.56 | -0.08 | .468 | -    | 22 <sup>b</sup> | 4.70 | 2.14 | Combining theory and practice    | Uni1 | 108 <sup>a</sup> | 3.16 | 1.95 | -1.09 | .282 | -    | 94 <sup>b</sup> | 3.48 | 2.22 |                                  | Uni2 | 34 <sup>a</sup>  | 3.85 | 2.11 | -1.43 | .079 | -    | 22 <sup>b</sup> | 4.72 | 2.37 |                                  |      |                  |      |      |       |      |      |                 |      |      |                                  |      |                  |      |      |       |      |      |                 |      |      |                               |      |                  |      |      |       |      |   |                 |      |      |                               |      |                  |      |      |       |      |   |                 |      |      |  |      |                 |      |      |       |
| Contact and cooperation          | Uni1       | 108 <sup>a</sup> | 4.12 | 2.03 | -0.89 | .377 | -    |                                  |      |                  |      |      |       |      |      |                 |      |      |                                  |      |                  |      |      |       |      |      |                 |      |      |                                  |      |                  |      |      |       |      |      |                 |      |      |                                  |      |                  |      |      |       |      |      |                 |      |      |                                  |      |                  |      |      |       |      |      |                 |      |      |                                  |      |                  |      |      |       |      |      |                 |      |      |                                  |      |                  |      |      |       |      |      |                 |      |      |                                  |      |                  |      |      |       |      |      |                 |      |      |                               |      |                  |      |      |       |      |   |                 |      |      |                               |      |                  |      |      |       |      |   |                 |      |      |  |      |                 |      |      |       |
|                                  |            | 94 <sup>b</sup>  | 4.40 | 2.35 |       |      |      |                                  | Uni2 | 34 <sup>a</sup>  | 4.48 | 2.31 | 0.56  | .581 | -    | 22 <sup>b</sup> | 4.13 | 2.39 | Performance pressure and failure | Uni1 | 108 <sup>a</sup> | 4.74 | 2.26 | 2.85  | .005 | 0.40 | 94 <sup>b</sup> | 3.82 | 2.35 |                                  | Uni2 | 34 <sup>a</sup>  | 4.64 | 2.56 | -0.08 | .468 | -    | 22 <sup>b</sup> | 4.70 | 2.14 | Combining theory and practice    | Uni1 | 108 <sup>a</sup> | 3.16 | 1.95 | -1.09 | .282 | -    | 94 <sup>b</sup> | 3.48 | 2.22 |                                  | Uni2 | 34 <sup>a</sup>  | 3.85 | 2.11 | -1.43 | .079 | -    | 22 <sup>b</sup> | 4.72 | 2.37 |                                  |      |                  |      |      |       |      |      |                 |      |      |                                  |      |                  |      |      |       |      |      |                 |      |      |                                  |      |                  |      |      |       |      |      |                 |      |      |                               |      |                  |      |      |       |      |   |                 |      |      |                               |      |                  |      |      |       |      |   |                 |      |      |  |      |                 |      |      |       |
|                                  | Uni2       | 34 <sup>a</sup>  | 4.48 | 2.31 | 0.56  | .581 | -    |                                  |      |                  |      |      |       |      |      |                 |      |      |                                  |      |                  |      |      |       |      |      |                 |      |      |                                  |      |                  |      |      |       |      |      |                 |      |      |                                  |      |                  |      |      |       |      |      |                 |      |      |                                  |      |                  |      |      |       |      |      |                 |      |      |                                  |      |                  |      |      |       |      |      |                 |      |      |                                  |      |                  |      |      |       |      |      |                 |      |      |                                  |      |                  |      |      |       |      |      |                 |      |      |                               |      |                  |      |      |       |      |   |                 |      |      |                               |      |                  |      |      |       |      |   |                 |      |      |  |      |                 |      |      |       |
|                                  |            | 22 <sup>b</sup>  | 4.13 | 2.39 |       |      |      | Performance pressure and failure | Uni1 | 108 <sup>a</sup> | 4.74 | 2.26 | 2.85  | .005 | 0.40 | 94 <sup>b</sup> | 3.82 | 2.35 |                                  | Uni2 | 34 <sup>a</sup>  | 4.64 | 2.56 | -0.08 | .468 | -    | 22 <sup>b</sup> | 4.70 | 2.14 | Combining theory and practice    | Uni1 | 108 <sup>a</sup> | 3.16 | 1.95 | -1.09 | .282 | -    | 94 <sup>b</sup> | 3.48 | 2.22 |                                  | Uni2 | 34 <sup>a</sup>  | 3.85 | 2.11 | -1.43 | .079 | -    | 22 <sup>b</sup> | 4.72 | 2.37 |                                  |      |                  |      |      |       |      |      |                 |      |      |                                  |      |                  |      |      |       |      |      |                 |      |      |                                  |      |                  |      |      |       |      |      |                 |      |      |                                  |      |                  |      |      |       |      |      |                 |      |      |                               |      |                  |      |      |       |      |   |                 |      |      |                               |      |                  |      |      |       |      |   |                 |      |      |  |      |                 |      |      |       |
| Performance pressure and failure | Uni1       | 108 <sup>a</sup> | 4.74 | 2.26 | 2.85  | .005 | 0.40 |                                  |      |                  |      |      |       |      |      |                 |      |      |                                  |      |                  |      |      |       |      |      |                 |      |      |                                  |      |                  |      |      |       |      |      |                 |      |      |                                  |      |                  |      |      |       |      |      |                 |      |      |                                  |      |                  |      |      |       |      |      |                 |      |      |                                  |      |                  |      |      |       |      |      |                 |      |      |                                  |      |                  |      |      |       |      |      |                 |      |      |                                  |      |                  |      |      |       |      |      |                 |      |      |                               |      |                  |      |      |       |      |   |                 |      |      |                               |      |                  |      |      |       |      |   |                 |      |      |  |      |                 |      |      |       |
|                                  |            | 94 <sup>b</sup>  | 3.82 | 2.35 |       |      |      |                                  | Uni2 | 34 <sup>a</sup>  | 4.64 | 2.56 | -0.08 | .468 | -    | 22 <sup>b</sup> | 4.70 | 2.14 | Combining theory and practice    | Uni1 | 108 <sup>a</sup> | 3.16 | 1.95 | -1.09 | .282 | -    | 94 <sup>b</sup> | 3.48 | 2.22 |                                  | Uni2 | 34 <sup>a</sup>  | 3.85 | 2.11 | -1.43 | .079 | -    | 22 <sup>b</sup> | 4.72 | 2.37 |                                  |      |                  |      |      |       |      |      |                 |      |      |                                  |      |                  |      |      |       |      |      |                 |      |      |                                  |      |                  |      |      |       |      |      |                 |      |      |                                  |      |                  |      |      |       |      |      |                 |      |      |                                  |      |                  |      |      |       |      |      |                 |      |      |                               |      |                  |      |      |       |      |   |                 |      |      |                               |      |                  |      |      |       |      |   |                 |      |      |  |      |                 |      |      |       |
|                                  | Uni2       | 34 <sup>a</sup>  | 4.64 | 2.56 | -0.08 | .468 | -    |                                  |      |                  |      |      |       |      |      |                 |      |      |                                  |      |                  |      |      |       |      |      |                 |      |      |                                  |      |                  |      |      |       |      |      |                 |      |      |                                  |      |                  |      |      |       |      |      |                 |      |      |                                  |      |                  |      |      |       |      |      |                 |      |      |                                  |      |                  |      |      |       |      |      |                 |      |      |                                  |      |                  |      |      |       |      |      |                 |      |      |                                  |      |                  |      |      |       |      |      |                 |      |      |                               |      |                  |      |      |       |      |   |                 |      |      |                               |      |                  |      |      |       |      |   |                 |      |      |  |      |                 |      |      |       |
|                                  |            | 22 <sup>b</sup>  | 4.70 | 2.14 |       |      |      | Combining theory and practice    | Uni1 | 108 <sup>a</sup> | 3.16 | 1.95 | -1.09 | .282 | -    | 94 <sup>b</sup> | 3.48 | 2.22 |                                  | Uni2 | 34 <sup>a</sup>  | 3.85 | 2.11 | -1.43 | .079 | -    | 22 <sup>b</sup> | 4.72 | 2.37 |                                  |      |                  |      |      |       |      |      |                 |      |      |                                  |      |                  |      |      |       |      |      |                 |      |      |                                  |      |                  |      |      |       |      |      |                 |      |      |                                  |      |                  |      |      |       |      |      |                 |      |      |                                  |      |                  |      |      |       |      |      |                 |      |      |                                  |      |                  |      |      |       |      |      |                 |      |      |                               |      |                  |      |      |       |      |   |                 |      |      |                               |      |                  |      |      |       |      |   |                 |      |      |  |      |                 |      |      |       |
| Combining theory and practice    | Uni1       | 108 <sup>a</sup> | 3.16 | 1.95 | -1.09 | .282 | -    |                                  |      |                  |      |      |       |      |      |                 |      |      |                                  |      |                  |      |      |       |      |      |                 |      |      |                                  |      |                  |      |      |       |      |      |                 |      |      |                                  |      |                  |      |      |       |      |      |                 |      |      |                                  |      |                  |      |      |       |      |      |                 |      |      |                                  |      |                  |      |      |       |      |      |                 |      |      |                                  |      |                  |      |      |       |      |      |                 |      |      |                                  |      |                  |      |      |       |      |      |                 |      |      |                               |      |                  |      |      |       |      |   |                 |      |      |                               |      |                  |      |      |       |      |   |                 |      |      |  |      |                 |      |      |       |
|                                  |            | 94 <sup>b</sup>  | 3.48 | 2.22 |       |      |      |                                  | Uni2 | 34 <sup>a</sup>  | 3.85 | 2.11 | -1.43 | .079 | -    | 22 <sup>b</sup> | 4.72 | 2.37 |                                  |      |                  |      |      |       |      |      |                 |      |      |                                  |      |                  |      |      |       |      |      |                 |      |      |                                  |      |                  |      |      |       |      |      |                 |      |      |                                  |      |                  |      |      |       |      |      |                 |      |      |                                  |      |                  |      |      |       |      |      |                 |      |      |                                  |      |                  |      |      |       |      |      |                 |      |      |                                  |      |                  |      |      |       |      |      |                 |      |      |                               |      |                  |      |      |       |      |   |                 |      |      |                               |      |                  |      |      |       |      |   |                 |      |      |  |      |                 |      |      |       |
|                                  | Uni2       | 34 <sup>a</sup>  | 3.85 | 2.11 | -1.43 | .079 | -    |                                  |      |                  |      |      |       |      |      |                 |      |      |                                  |      |                  |      |      |       |      |      |                 |      |      |                                  |      |                  |      |      |       |      |      |                 |      |      |                                  |      |                  |      |      |       |      |      |                 |      |      |                                  |      |                  |      |      |       |      |      |                 |      |      |                                  |      |                  |      |      |       |      |      |                 |      |      |                                  |      |                  |      |      |       |      |      |                 |      |      |                                  |      |                  |      |      |       |      |      |                 |      |      |                               |      |                  |      |      |       |      |   |                 |      |      |                               |      |                  |      |      |       |      |   |                 |      |      |  |      |                 |      |      |       |
|                                  |            | 22 <sup>b</sup>  | 4.72 | 2.37 |       |      |      |                                  |      |                  |      |      |       |      |      |                 |      |      |                                  |      |                  |      |      |       |      |      |                 |      |      |                                  |      |                  |      |      |       |      |      |                 |      |      |                                  |      |                  |      |      |       |      |      |                 |      |      |                                  |      |                  |      |      |       |      |      |                 |      |      |                                  |      |                  |      |      |       |      |      |                 |      |      |                                  |      |                  |      |      |       |      |      |                 |      |      |                                  |      |                  |      |      |       |      |      |                 |      |      |                               |      |                  |      |      |       |      |   |                 |      |      |                               |      |                  |      |      |       |      |   |                 |      |      |  |      |                 |      |      |       |

395 Note. N<sub>beginners</sub> = 142; N<sub>advanced</sub> = 116; M = mean; SD = standard deviation; t = t-value for  
 396 difference between beginners and advanced of medical studies; p = p-value for t-tests;  
 397 d = Cohen's d; <sup>a</sup> = beginners; <sup>b</sup> = advanced.
